# Supplementary material for: USP15-dependent lysosomal pathway controls p53-R175H turnover in ovarian cancer cells
Source: PubMed Central journal article supplement (PMC5871815; doi:10.1038/s41467-018-03599-w), 2018-03-28
Supplement: 41467_2018_3599_MOESM1_ESM.pdf [file 41467_2018_3599_MOESM1_ESM.pdf]

## Supplementary Information

**USP15-dependent lysosomal pathway controls p53-R175H turnover in ovarian cancer cells**

Padmanabhan et.al.

## Supplementary Figures

**A**

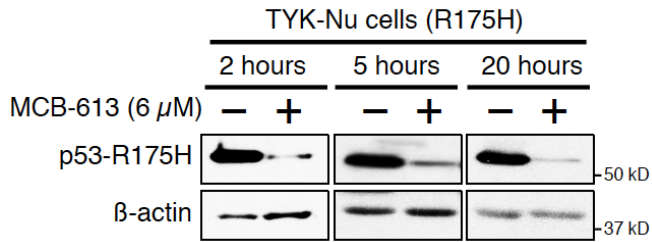

**B**

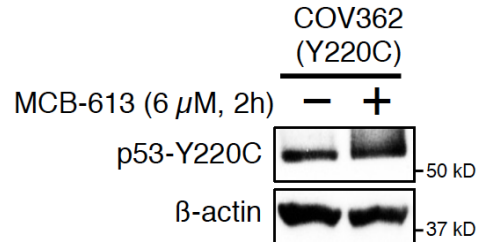

**C**

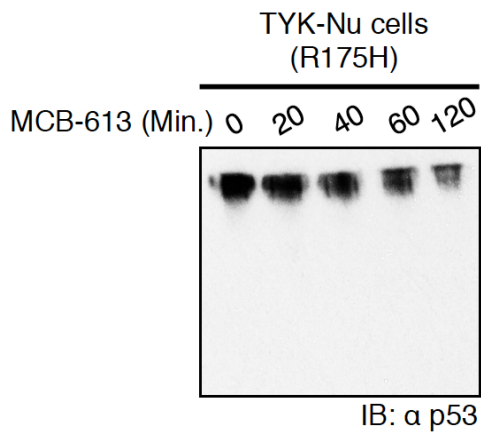

### Supplementary Figure 1. MCB-613 causes a rapid and selective decrease in the level of p53-R175H.

(A) MCB-613 (6  $\mu$ M) causes sustained decrease in p53-R175H levels in TYK-Nu cells.

(B) MCB-613 (6  $\mu$ M, 2h) does not alter the levels of p53-Y220C in COV362 cells.

(C) Native gel-western blot analysis showing the levels of p53-R175H is reduced upon MCB-613 treatment in a time-dependent manner.

**A**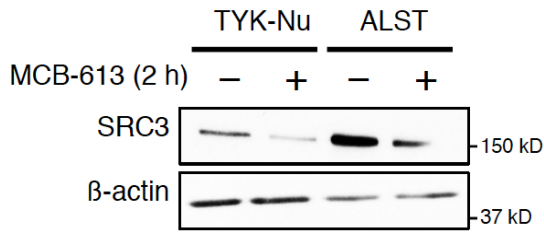**B**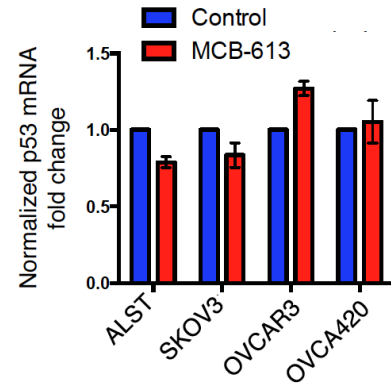**C**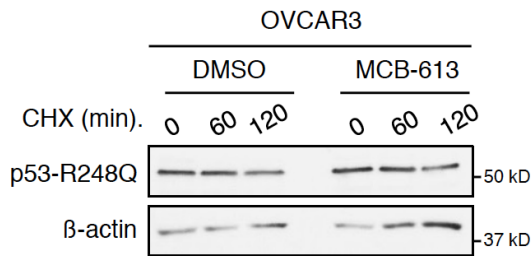**D**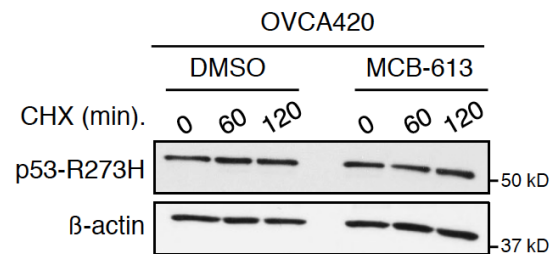**E**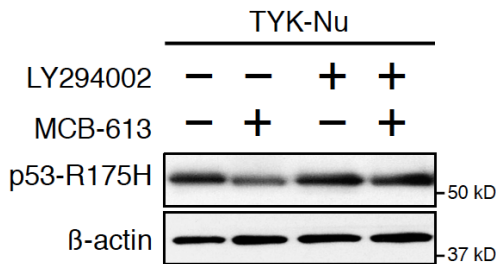

### Supplementary Figure 2. MCB-613 has no effect on the half-life of p53-R248Q and p53-R273H.

**(A)** MCB-613 treatment (6  $\mu$ M, 2h) causes a decrease in SRC3 levels in both TYK-Nu and ALST cells.

**(B)** Effect of MCB-613 (6  $\mu$ M, 2h) on p53 mRNA levels in ALST, SKOV3, OVCAR3 and OVCA420 cells. The data for ALST cells is the same as that in Figure 2A and has been included here for comparison. Values are mean  $\pm$  s.e.m (N=3).

**(C and D)** Cycloheximide chase analysis show that MCB-613 (6  $\mu$ M) has no effect on the turnover of **(C)** p53-R248Q mutant protein in OVCAR3 cells and **(D)** p53-R273H mutant protein in OVCA420 cells.

**(E)** The effect of MCB-613 on p53-R175H is reversed upon co-treatment with the autophagy inhibitor LY294002.

**A**

TYK-Nu Cells (p53-R175H)

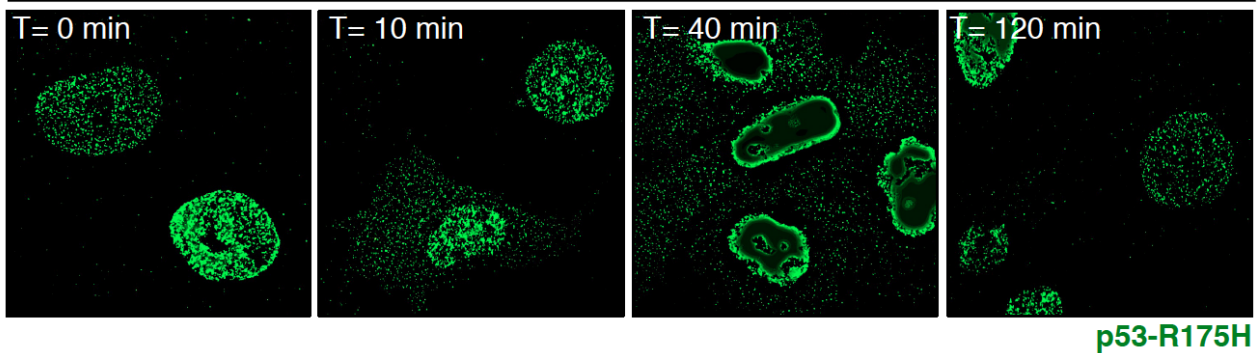**B**

ALST Cells (p53-WT)

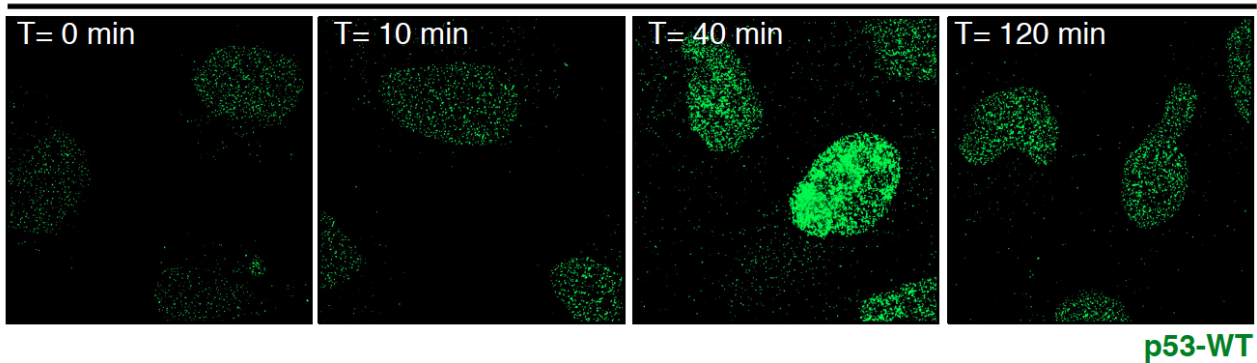**C**

TYK-Nu Cells

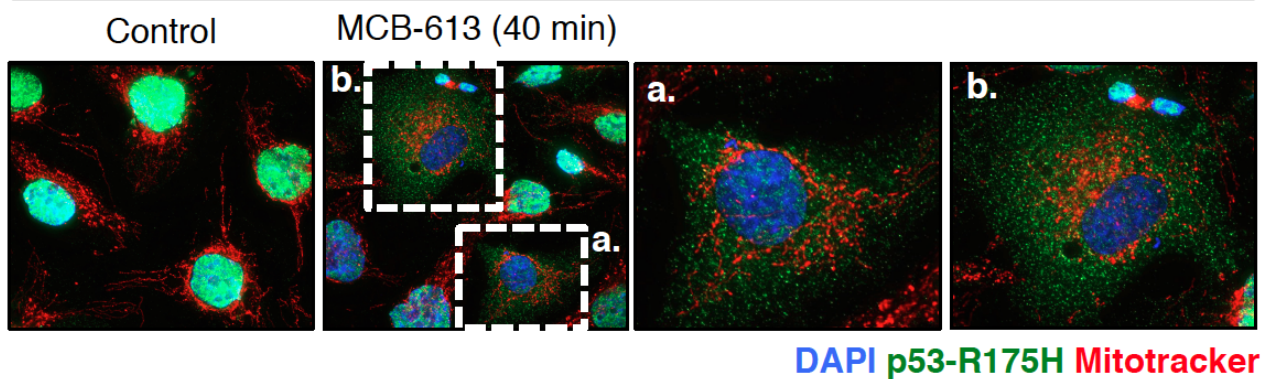

**Supplementary Figure 3. p53-R175H does not co-localize with mitochondria upon MCB-613 treatment.**

**(A)** p53-R175H (green) protein in TYK-Nu cells localizes in the cytoplasm upon MCB-613 treatment. This figure shows the p53 (green) channel from figure 3A.

**(B)** Localization of p53-WT (green) protein in ALST is not altered upon MCB-613 treatment. This figure shows the p53 (green) channel from figure 3B.

**(C)** Co-immunofluorescence studies using TYK-Nu cells show absence of co-localization of p53-R175H (green) and mitochondria (mitotracker; red) upon MCB-613 treatment (6  $\mu$ M, 40 min).

**A**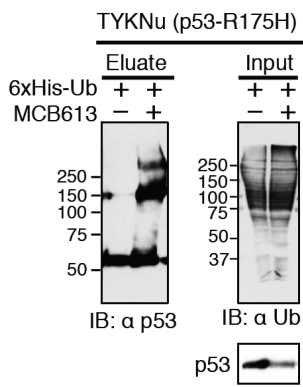**B**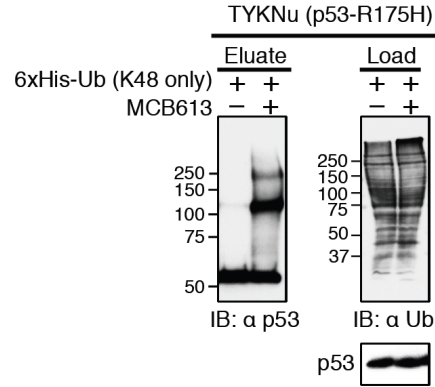**C**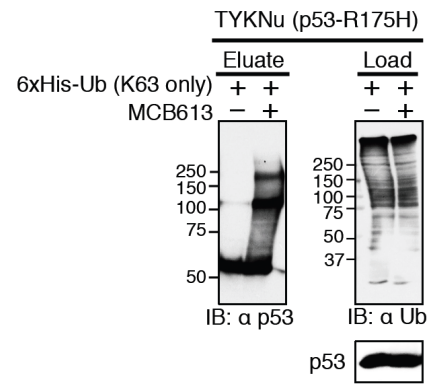**D**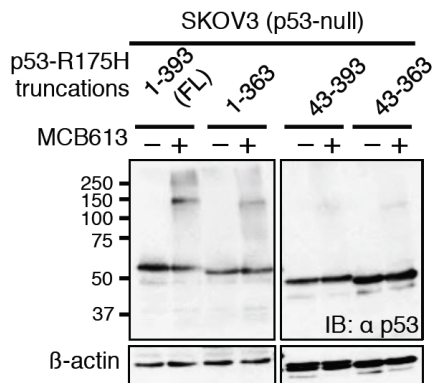**E**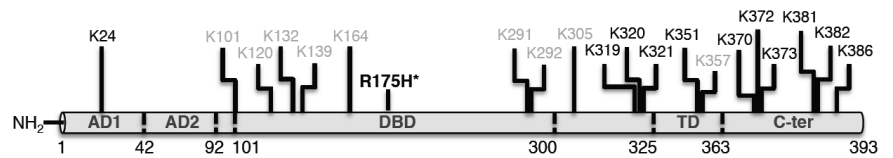**F**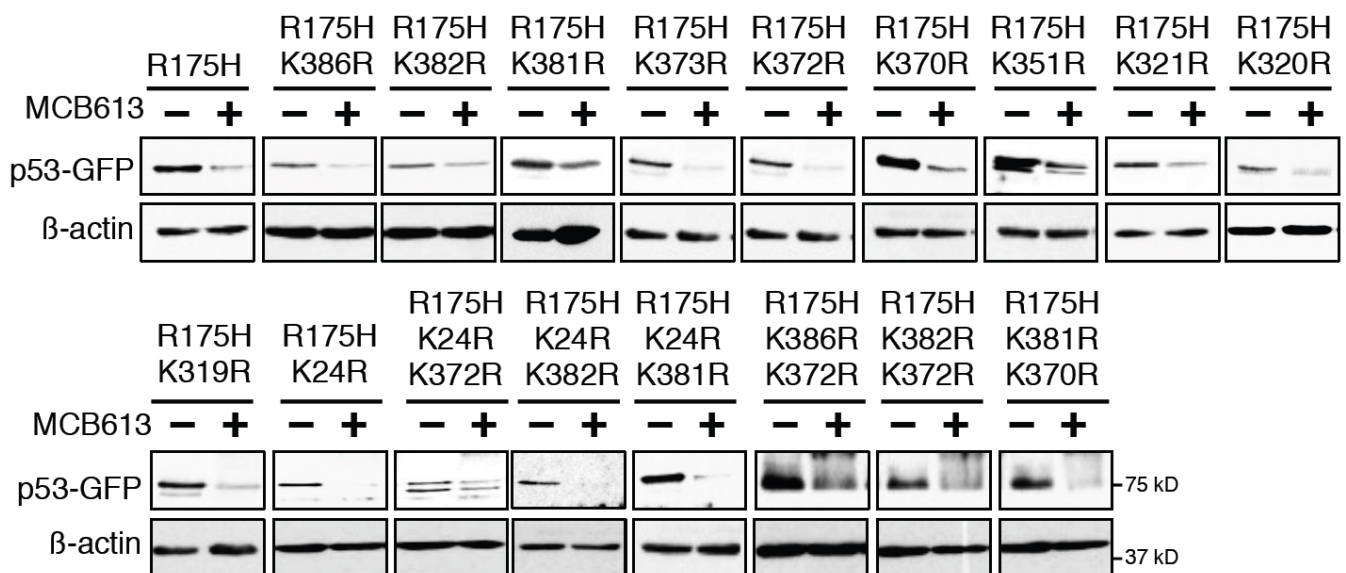

**G**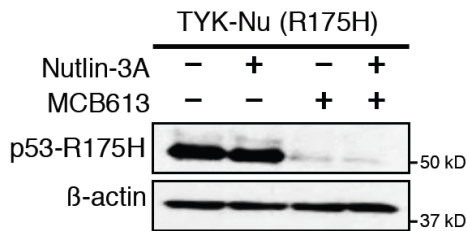**H**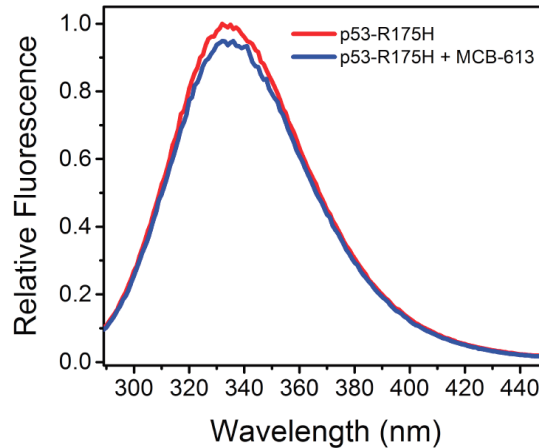**I**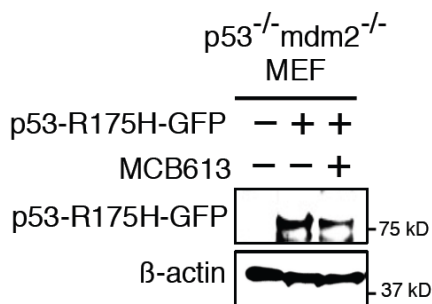**J**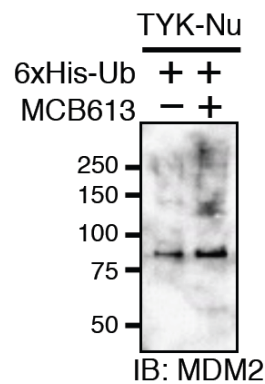

### Supplementary Figure 4. Effect of MCB-613 on p53-175H is ubiquitination-dependent.

**(A)** Anti-p53 immunoblot on cellular proteins containing His-ubiquitin (pull down by Ni NTA chromatography) from TYK-Nu cells expressing ectopic 6xHis-Ub reveals increased ubiquitination of p53-R175H protein upon MCB-613 treatment.

**(B)** K-48 ubiquitin chains on p53-R175H protein is enhanced upon MCB-613 treatment in TYK-Nu cells.

**(C)** K-63 ubiquitin chains on p53-R175H protein is enhanced upon MCB-613 treatment in TYK-Nu cells.

**(D)** SKOV3 cells expressing carboxy and amino terminal deletion mutants of p53 R175H-HA (a kind gift from Dr. Wenwei Hu, Rutgers Univ., New Brunswick, NJ, USA) show that deletion of the amino terminal 42 amino acids or the carboxy terminal 30 amino acids from p53-R175H-HA mutant protein reverses the sensitivity of the R175H mutant to MCB-613.

**(E)** Cartoon showing lysine residues on p53 that can serve as potential ubiquitination sites. Sites that were mutated to arginine to test their role in MCB-613 induced turnover of p53-R175H is shown in black. Other potential ubiquitination sites are shown in grey. AD – Activation domain; DBD – DNA binding domain; TD – transactivation domain; C-ter – C-terminal domain. Amino acid positions are shown below.

**(F)** Effect of MCB-613 (6 μM, 2h) on ectopically expressed GFP-tagged p53-R175H protein containing additional lysine to arginine (K→R) substitution mutations (as indicated) in SKOV3 cells (p53-null).

**(G)** Effect of Nutlin-3A (10 μM, 2h) on p53-R175H levels in TYK-Nu cells either by itself or in combination with MCB-613 (6 μM, 2h).

(H) MCB-613 does not bind to p53-R175H protein. Fluorescence binding assay was performed using recombinant purified p53-R175H protein and MCB-613 (6  $\mu$ M).

(I) Effect of MCB-613 on p53-R175H in p53<sup>-/-</sup>: mdm2<sup>-/-</sup> MEFs (a kind gift from Dr. Gigi Lozano, MD Anderson Cancer Center, Houston, TX, USA).

(J) MCB-613 causes increased ubiquitination of MDM2 in TYK-Nu cells. Anti-MDM2 immunoblot on cellular proteins containing His-ubiquitin (pull down by Ni-NTA chromatography) from TYK-Nu cells expressing ectopic 6xHis-Ub. This figure was generated from the same samples used in Supplementary Figure 4A.

**A**

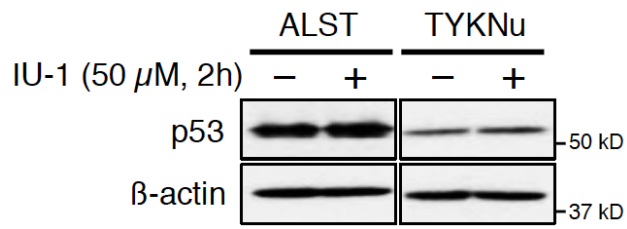

**Supplementary Figure 5. USP14 inhibition has no effect of p53-WT or p53-R175H levels.**  
**(A)** The USP14 specific inhibitor IU-1 (50  $\mu$ M, 2h) had no effect on p53-WT in ALST cells and p53-R175H in TYK-Nu cells.



**A**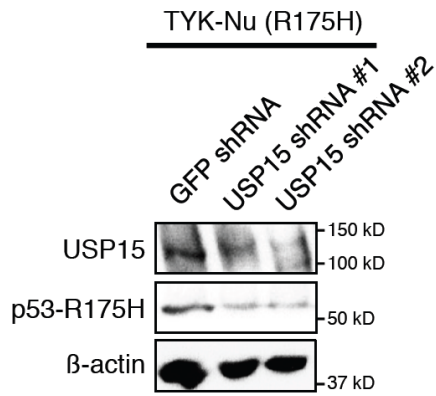**B**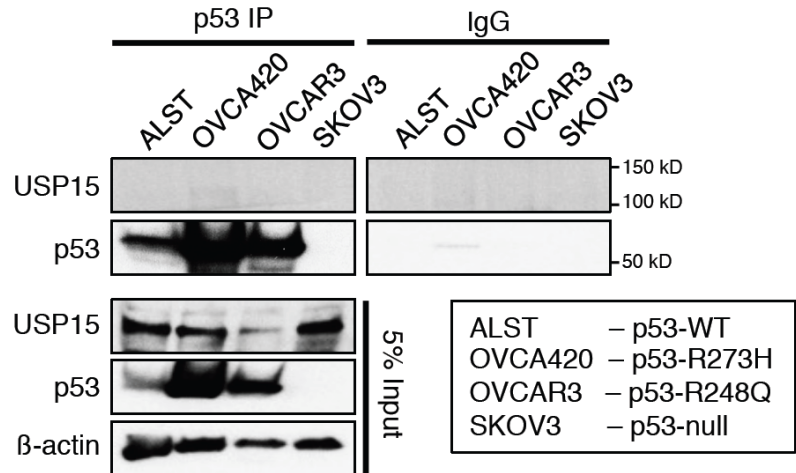**C**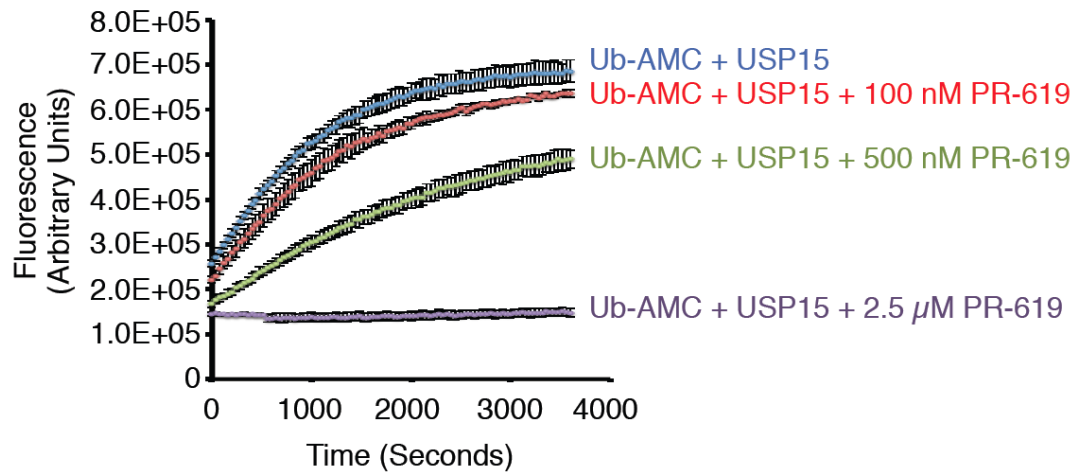**D**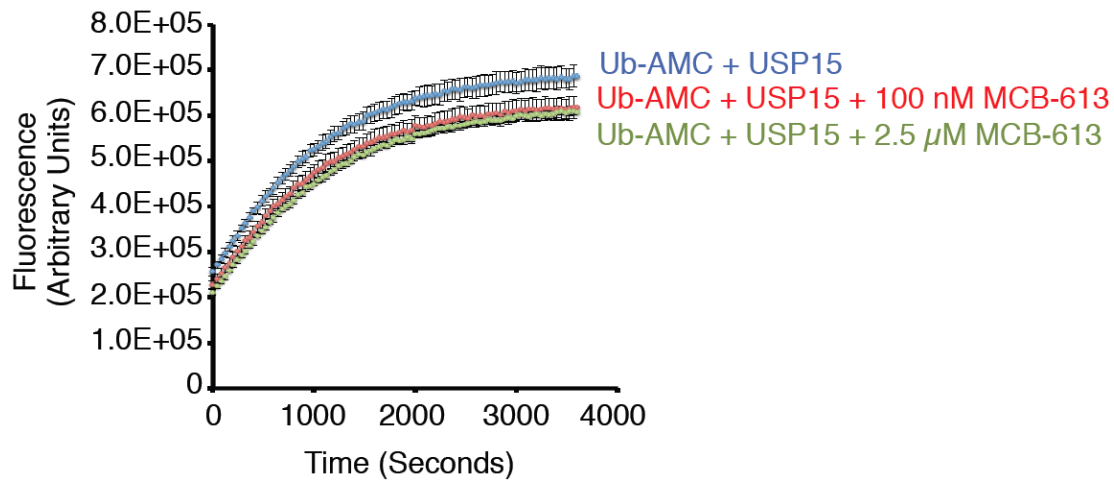

**E**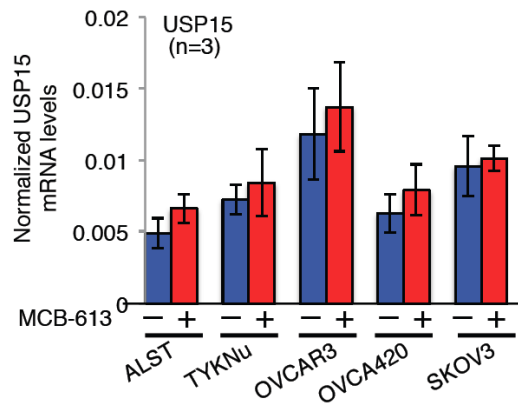**F**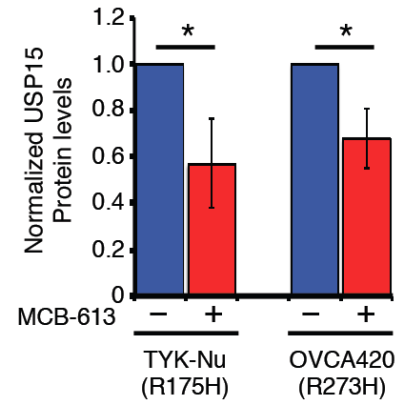

### Supplementary Figure 6. Role of USP15 and USP7 in regulating the turnover of mutp53 proteins in ovarian cancer cells.

- (A)** USP15 knockdown using two different shRNA constructs results in decreased levels of p53-R175H protein in TYK-Nu cells.
- (B)** USP15 does not co-IP with p53-WT (in ALST cells), p53-R273H (in OVCA420 cells) and p53-R248Q (in OVCAR3 cells). p53-null SKOV3 cells was used in in as a control for non-specific binding of the p53 antibody (FL-393).
- (C)** DUB activity assay using Ub-AMC substrate shows PR-619 acts as a USP15 inhibitor. Values are mean  $\pm$  s.e.m (N=3).
- (D)** DUB activity assay using Ub-AMC substrate shows MCB-613 does not inhibit USP15 catalytic activity. Values are mean  $\pm$  s.em (N=3).
- (E)** Quantitative RT-PCR analyses shows that MCB-613 (6  $\mu$ M, 2h) does not alter USP15 mRNA levels in the ovarian cancer cells carrying different p53 mutation status. USP15 mRNA levels were normalized using rpl19 mRNA levels in the corresponding samples. Values are mean  $\pm$  s.d (N=3).
- (F)** Quantification of western blot analysis showing MCB-613 induces decrease in USP15 levels in both TYK-Nu and OVCA420 cells. The western blots were analyzed using imgae J and the USP15 expression was normalized to the corresponding  $\beta$ -actin levels. Values are mean  $\pm$  s.d (N=3; p-value <0.05).

**A**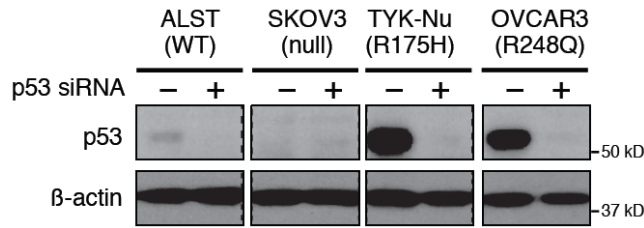**B**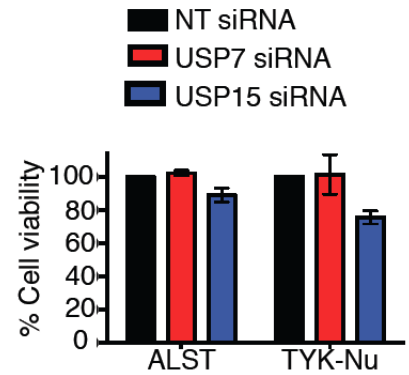**C**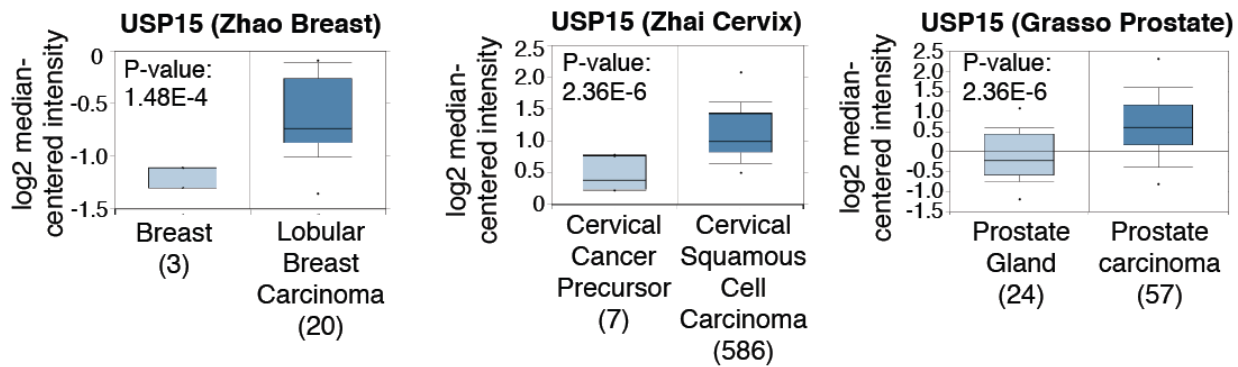

**Supplementary Figure 7. USP15 depletion causes cancer cell death in ovarian cancer cells expressing p53-R175H.**

**(A)** Western blot showing depletion of mutant p53 protein in cells treated with p53 siRNA.

**(B)** USP7 siRNA (48h) had no effect on cell viability in ALST and TYK-Nu cells. USP15 knockdown (48h) resulted in decreased viability of TYK-Nu cells. Values are mean  $\pm$  s.e.m (N=3).

**(C)** Data retrieved from Oncomine showing elevated *USP15* mRNA levels in multiple cancers from previously published datasets<sup>14, 23-26</sup>.

**A**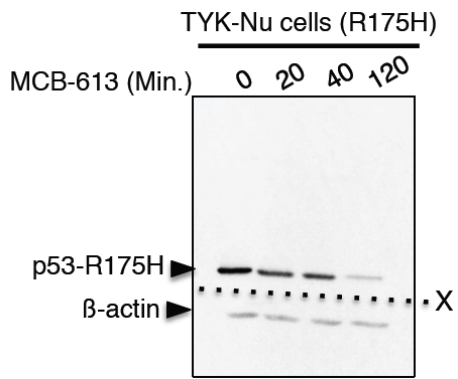**B**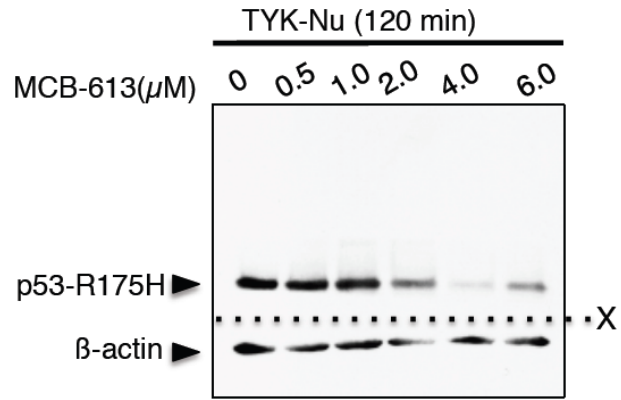**C**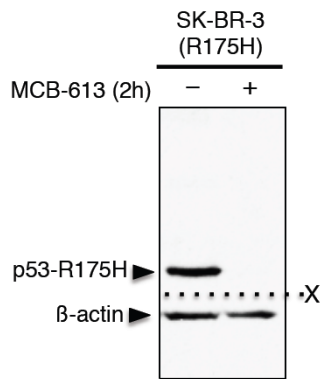**D**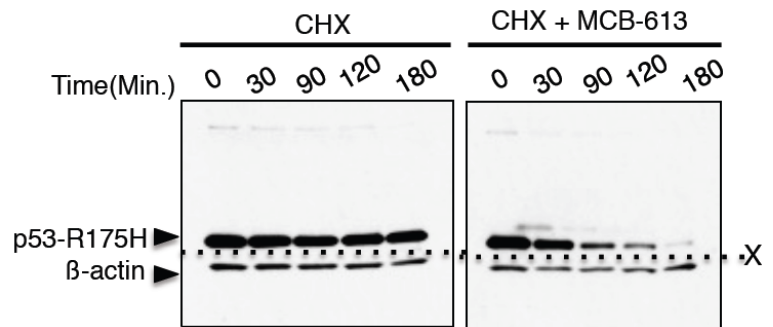**E**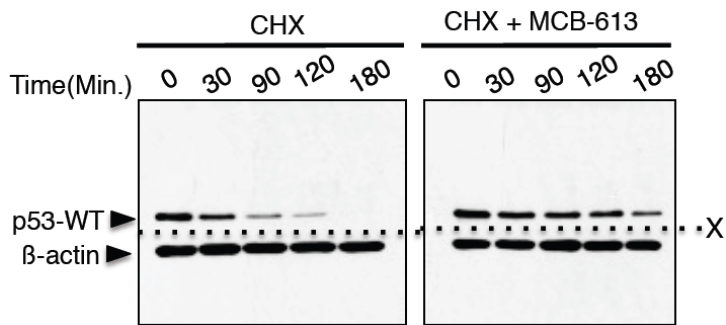**F**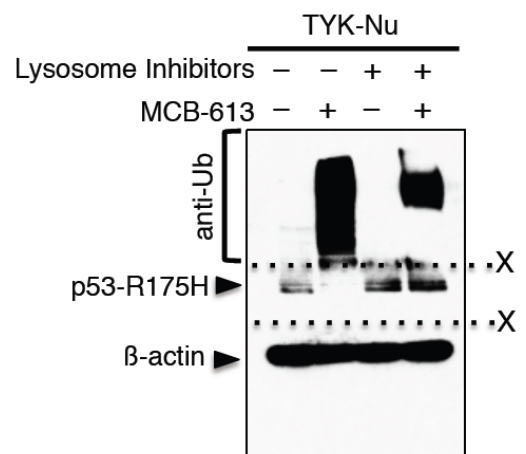

**G**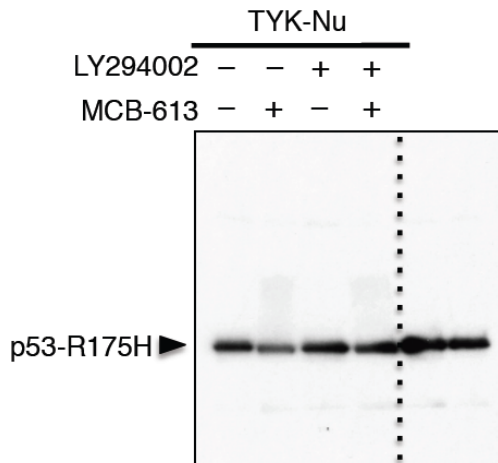**H**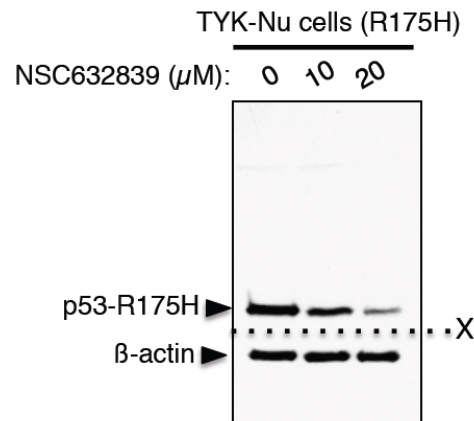**I**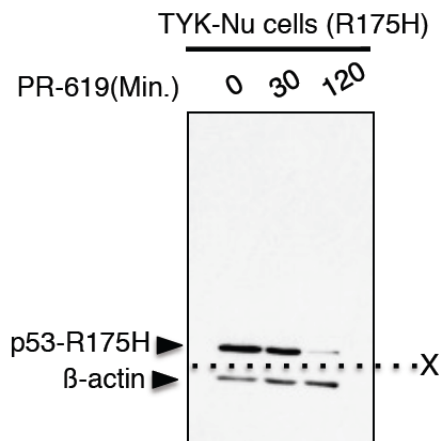**J**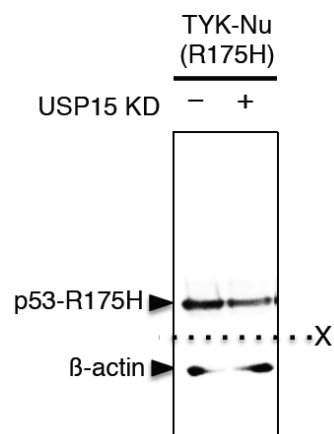

**Supplementary Figure 8. Un-cropped scans of the key Western blots images in the paper.**

(A) Un-cropped Fig. 1A. (B) Un-cropped Fig. 1B. (C) Un-cropped Fig. 1G. (D) Un-cropped Fig. 2G. (E) Un-cropped Fig. 2H. (F) Un-cropped Fig. 2J (G) Un-cropped Fig. S2E. (H) Un-cropped Fig. 5D. (I) Un-cropped Fig. 5F. (J) Un-cropped Fig. 6D. The dotted lines with 'x' at the end indicates the position at which the transferred PVDF membrane was cut to probe against different antibodies (as indicated). In Fig.S8G, the dotted line is used to indicate where the western blot was cropped. The PVDF membrane in Fig.S8G was not cut prior to performing Western blot.

## Supplementary Tables :

| Gene                     | Primer                                                                                                     |
|--------------------------|------------------------------------------------------------------------------------------------------------|
| p53-R248Q<br>mutagenesis | Fwd: 5' CATGGGCGGCATGAACCAAAGGCCCATCCTCACCATC 3'<br>Rev: 5' GATGGTGAGGATGGGCCTTTGGTTCATGCCGCCCATG 3'       |
| p53-K386R<br>mutagenesis | Fwd: 5' CATAAAAACTCATGTTTCAGGACAGAAGGGCCTGACTC 3'<br>Rev: 5' GAGTCAGGCCCTTCTGTCCTGAACATGAGTTTTTTATG 3'     |
| p53-K382R<br>mutagenesis | Fwd: 5' CTCCCGCCATAAAAGACTCATGTTCAAGAC 3'<br>Rev: 5' GTCTTGAACATGAGTCTTTTTATGGCGGGAG 3'                    |
| p53-K381R<br>mutagenesis | Fwd: 5' CTACCTCCCGCCATAGAAAACACTCATGTTCAAG 3'<br>Rev: 5' CTTGAACATGAGTTTTCTATGGCGGGAGGTAG 3'               |
| p53-K373R<br>mutagenesis | Fwd: 5' CCTGAAGTCCAAAAGGGGTCAGTCTACC 3'<br>Rev: 5' GGTAGACTGACCCCTTTTGGACTTCAGG 3'                         |
| p53-K372R<br>mutagenesis | Fwd: 5' CCACCTGAAGTCCAGAAAGGGTCAGTCTAC 3'<br>Rev: 5' GTAGACTGACCCTTTCTGGACTTCAGGTGG 3'                     |
| p53-K370R<br>mutagenesis | Fwd: 5' CCAGCCACCTGAGGTCCAAAAGGG 3'<br>Rev: 5' CCCTTTTTGGACCTCAGGTGGCTGG 3'                                |
| p53-K351R<br>mutagenesis | Fwd: 5' GAATGAGGCCTTGGAACTCCGAGATGCCCAGGCTGGGAAG 3'<br>Rev: 5' CTTCCCAGCCTGGGCATCTCGGAGTTCCAAGGCCTCATTC 3' |
| p53-K321R<br>mutagenesis | Fwd: 5' CAGCCAAAGAAGAGACCACTGGATGGAG 3'<br>Rev: 5' CTCCATCCAGTGGTCTCTTCTTTGGCTG 3'                         |
| p53-K320R<br>mutagenesis | Fwd: 5' CCCAGCCAAAGAGGAAACCACTGGATG 3'<br>Rev: 5' CATCCAGTGGTTTTCTCTTTGGCTGGGG 3'                          |
| p53-K319R<br>mutagenesis | Fwd: 5' CTCCCAGCCAAGGAAGAAACCACTG 3'<br>Rev: 5' CAGTGGTTTTCTTCTTTGGCTGGGGAG 3'                             |
| p53-K24R<br>mutagenesis  | Fwd: 5' CATTTCAGACCTATGGAGGCTACTTCTGAAAACAAC 3'<br>Rev: 5' GTTGTTTTAGGAAGTAGCCTCCATAGGTCTGAAAATG 3'        |

**Supplementary Table 1. List of primers used for site-directed mutagenesis.**

| Target protein         | Vendor                       | Species | Cat. Number | Dilution                              |
|------------------------|------------------------------|---------|-------------|---------------------------------------|
| p53 (FL-393)           | Santa Cruz                   | Rabbit  | sc-6243     | WB: 1:1000<br>IF : 1:250<br>IP : 1:50 |
| p53 (DO-1)             | Santa Cruz                   | Mouse   | Sc-126      | WB: 1:1000<br>IF : 1:250              |
| SRC1                   | BD Transduction Laboratories | Mouse   | 612378      | WB: 1:1000                            |
| SRC2                   | Bethyl Laboratories          | Rabbit  | A300-346A   | WB: 1:1000                            |
| SRC3                   | Cell Signaling               | Rabbit  | 2126S       | WB: 1:1000                            |
| Ubiquitin              | Cell Signaling               | Rabbit  | 3933S       | WB: 1:1000                            |
| Ubiquitin (P4D1)       | Santa Cruz                   | Mouse   | sc8017      | WB: 1:1000                            |
| MDM2 (Ab-1)            | Calbiochem                   | Mouse   | OP46        | WB: 1:1000                            |
| USP7                   | Bethyl Laboratories          | Rabbit  | A300-033A   | WB: 1:1000                            |
| USP15 (B-5)            | Santa Cruz                   | Mouse   | sc-515688   | WB: 1:1000                            |
| $\beta$ -actin (AC-74) | Sigma-Aldrich                | Mouse   | A-2228      | WB: 1:5000                            |
| Calnexin               | Abcam                        | Rabbit  | ab75801     | IF : 1:300                            |

**Supplementary Table 2. Details of list of antibodies used in this study.** WB – Western blot ; IF – Immunofluorescence ; IP – Immunoprecipitation.

| Target gene | Primer Sequence                                                      |
|-------------|----------------------------------------------------------------------|
| p53         | Fwd: 5' AAGTCCTTTGCCCTGAACTG 3'<br>Rev: 5' GGCTTGGAAGGCTCTAGG 3'     |
| MDM2        | Fwd: 5' TGTTGTGAAAGAAGCAGTAGCA 3'<br>Rev: 5' CCTGATCCAACCAATCACCT 3' |
| RPL19       | Fwd: 5' GGTGACCTGGATGAGAAGGA 3'<br>Rev: 5' TTCAGCTTGTGGATGTGCTC 3'   |
| USP15       | Fwd: 5' CGACGCTGCTCAAAACCTC 3'<br>Rev: 5' TCCCATCTGGTATTTGTCCCAA 3'  |

**Supplementary Table 3. List of primers used for qRT-PCR described in this study.**

| Sample name         | Read count | Paired, mapped pairs % | Paired, broken pairs % | Paired, not mapped % |
|---------------------|------------|------------------------|------------------------|----------------------|
| MCF-7 untreated-1   | 66656814   | 95.6                   | 2.14                   | 2.26                 |
| MCF-7 untreated-2   | 80456708   | 85.07                  | 4.17                   | 10.75                |
| NSC632839 treated-1 | 42890788   | 81.35                  | 14.68                  | 3.96                 |
| NSC632839 treated-2 | 28255192   | 78.69                  | 15.68                  | 5.63                 |
| MCB-613 treated-1   | 32351076   | 74.75                  | 17.54                  | 7.71                 |
| MCB-613 treated-2   | 31792966   | 47.67                  | 29.72                  | 22.61                |

**Supplementary Table 4. Read count statistics for RNAseq data.**

| Sample name         | Mapped to genes % | Mapped to intergenic % |
|---------------------|-------------------|------------------------|
| MCF-7 untreated-1   | 96.26             | 3.74                   |
| MCF-7 untreated-2   | 96.29             | 3.71                   |
| NSC632839 treated-1 | 97.54             | 2.46                   |
| NSC632839 treated-2 | 97.48             | 2.52                   |
| MCB-613 treated-1   | 97.39             | 2.61                   |
| MCB-613 treated-2   | 96.53             | 3.47                   |

**Supplementary Table 5. Fragment counting statistics for RNAseq data.**
